# Supplementary material
Source: publisher figshare collection journal article supplement (https://geolsoc.figshare.com/ndownloader/files/5426489)
Supplement: Supplementary file 1 [file 5426489]

Table 1. U-Th-Pb ion-microprobe analytical results
									Uncorrected4					Corrected5
Grain	U	Th	Pb		206Pb	f2062	Disc.3	207Pb		206Pb			207Pb		206Pb			Age (Ma)6
number	ppm	ppm	ppm	Th/U1	204Pb	(%)	%(2s)	206Pb	± s (%)	238U	± s (%)		206Pb	± s (%)	238U	± s (%)		± 1s (abs)
VP04-019, Novaya Zemlya turbiditic sandstone below unconformity (N. Lat. 70°33.006, E. Long. 056°36.597)
1	1100	370	110	0.34	444	[4.21]	-55.8	0.0879	1.6	0.0828	2.1		0.0550	6.4	0.0793	2.1
2	380	80	36	0.21	4770	[0.39]	-3.9	0.06002	1.1	0.0833	2.1		0.05697	1.7	0.0829	2.1		514 ± 11
3	850	220	81	0.25	30300	[0.06]		0.05771	0.89	0.0839	2.1		--	--	--	--		519 ± 11
4	270	88	27	0.32	16400	[0.11]		0.05980	1.3	0.0844	1.8		--	--	--	--		521 ± 9
5	760	180	74	0.24	3350	[0.56]	-16.5	0.06203	0.66	0.0848	2.1		0.05769	1.1	0.0843	2.1
6	330	83	32	0.25	3600	[0.52]		0.05936	1.2	0.0847	2.1		0.0553	1.8	0.0842	2.1		523 ± 11
7	440	110	42	0.26	7420	[0.25]		0.05872	0.94	0.0850	1.8		0.05676	1.1	0.0847	1.8		525 ± 9
8	490	120	47	0.24	11200	[0.17]		0.05922	1.0	0.0853	1.8		0.05792	1.2	0.0852	1.8		527 ± 9
9	460	120	45	0.27	20200	[0.09]		0.05838	1.2	0.0852	1.8		--	--	--	--		527 ± 9
10	170	49	17	0.29	3080	[0.61]		0.0602	1.7	0.0854	2.1		0.0554	2.6	0.0849	2.1		527 ± 11
11	1500	430	150	0.29	2640	[0.71]	-24	0.06395	0.49	0.0862	2.1		0.05843	0.75	0.0856	2.1
12	1700	270	160	0.16	9300	[0.20]		0.05832	0.75	0.0867	2.1		0.05676	1.0	0.0865	2.1		536 ± 11
13	630	200	63	0.32	13100	[0.14]		0.05765	0.65	0.0866	1.8		0.05654	0.77	0.0865	1.8		536 ± 9
14	530	180	53	0.35	18500	[0.10]		0.05806	0.93	0.0867	1.8		0.05727	1.1	0.0866	1.8		536 ± 9
15	180	50	18	0.27	8510	[0.22]		0.05921	1.5	0.0872	1.8		--	--	--	--		538 ± 9
16	210	52	21	0.25	6540	[0.29]	-21	0.05888	1.2	0.0875	1.8		0.05665	1.5	0.0872	1.8
17	180	60	19	0.34	1180	[1.58]		0.06599	1.5	0.0897	1.8		0.0536	3.6	0.0883	1.8		548 ± 10
18	640	150	65	0.23	3430	[0.55]		0.06038	1.4	0.0892	2.1		0.0561	2.1	0.0887	2.1		550 ± 11
19	290	120	31	0.43	10000	[0.19]		0.05892	1.2	0.0892	1.8		0.05747	1.3	0.0890	1.8		551 ± 10
20	840	210	87	0.25	6490	[0.29]		0.05988	1.2	0.0907	2.1		0.05763	1.5	0.0904	2.1		559 ± 12
21	200	59	22	0.3	3580	[0.52]		0.05932	1.1	0.0936	1.8		0.05524	1.6	0.0931	1.8		577 ± 10
22	490	160	55	0.33	3960	[0.47]		0.0602	2.0	0.0945	2.1		0.0565	2.7	0.0940	2.1		581 ± 12
23	760	230	83	0.31	4370	[0.43]		0.05930	1.4	0.0944	2.1		0.0560	1.9	0.0940	2.1		581 ± 12
24	1200	290	130	0.25	6100	[0.31]		0.06060	1.2	0.0946	2.1		0.05822	1.5	0.0943	2.1		582 ± 12
25	390	130	43	0.33	5050	[0.37]		0.0609	2.1	0.0949	2.1		0.0580	2.9	0.0945	2.1		583 ± 12
26	650	400	79	0.62	32300	[0.06]		0.06036	0.78	0.0973	2.1		--	--	--	--		598 ± 12
27	81	16	9.2	0.2	1170	[1.60]	-11.4	0.0657	1.8	0.0981	2.2		0.0532	5.0	0.0965	2.2
28	230	150	28	0.67	4980	[0.38]		0.06116	1.2	0.0977	1.8		0.05824	1.6	0.0973	1.8		600 ± 10
29	17	4.8	2.1	0.28	572	[3.27]	-2.9	0.0728	5.8	0.0992	2.3		0.0470	21.	0.0960	2.4		600 ± 14
30	180	91	22	0.5	1750	[1.07]	-4.1	0.0639	1.8	0.0985	1.8		0.0555	2.8	0.0974	1.8		603 ± 10
31	54	26	6.5	0.47	1990	[0.94]		0.0614	2.8	0.0985	1.8		0.0541	4.7	0.0975	1.8		604 ± 11
32	110	27	12	0.25	6070	[0.31]		0.0604	2.5	0.0984	2.2		--	--	--	--		605 ± 13
33	160	44	19	0.27	2990	[0.63]		0.0623	1.9	0.0986	2.1		0.0574	3.0	0.0980	2.1		605 ± 13
34	630	330	76	0.53	10400	[0.18]		0.06033	0.67	0.0988	2.1		0.05893	0.78	0.0986	2.1		607 ± 13
35	31	1.3	3.3	0.043	4180	[0.45]		0.0662	3.5	0.1000	2.2		--	--	--	--		610 ± 13
36	790	160	88	0.2	20200	[0.09]		0.06121	0.63	0.0999	2.1		0.06050	0.69	0.0998	2.1		613 ± 13
37	150	64	18	0.43	3930	[0.48]	-3.5	0.06376	1.5	0.1011	1.8		0.0601	2.3	0.1006	1.8		618 ± 11
38	32	23	4.5	0.73	724	[2.58]	-35.1	0.0855	3.2	0.1054	2.1		0.0656	7.8	0.1027	2.1
39	110	67	15	0.59	2550	[0.73]		0.0632	2.2	0.1039	2.1		0.0575	3.4	0.1031	2.1		635 ± 13
40	160	280	26	1.8	5090	[0.37]		0.06031	1.5	0.1041	1.8		0.0575	2.0	0.1037	1.8		639 ± 11
41	290	130	37	0.43	1680	[1.11]		0.06293	1.2	0.1060	1.8		0.0542	2.1	0.1048	1.8		648 ± 11
42	75	62	11	0.82	2520	[0.74]		0.0627	1.7	0.1074	1.8		0.0569	3.1	0.1066	1.8		657 ± 11
43	48	48	7.1	0.99	2280	[0.82]		0.0611	2.9	0.1079	1.8		0.0547	4.4	0.1070	1.8		661 ± 12
44	10	9.4	2.1	0.9	118	[15.91]	-59.4	0.1646	3.2	0.1248	1.9		0.038	50.	0.1050	1.8
45	41	11	5.8	0.28	260	[7.18]	-22.1	0.0835	4.6	0.1121	2.2		--	--	--	--
46	170	130	25	0.74	1090	[1.72]	-32.9	0.0777	1.5	0.1114	1.8		0.0644	2.6	0.1095	1.8
47	33	25	4.9	0.76	759	[2.47]	-15.9	0.0725	2.6	0.1109	2.1		0.0532	8.5	0.1081	2.1
48	42	12	5.7	0.28	651	[2.87]	-7.9	0.0767	5.3	0.1115	2.2		0.0542	16.	0.1083	2.3		669 ± 15
49	82	44	11	0.54	1930	[0.97]		0.0634	2.0	0.1097	2.1		0.0558	3.6	0.1087	2.1		670 ± 14
50	180	160	27	0.88	4110	[0.46]	-5.8	0.06564	1.2	0.1104	2.1		0.0621	1.6	0.1099	2.1		672 ± 14
51	34	20	4.6	0.59	3080	[0.61]		0.0612	2.7	0.1100	2.1		--	--	--	--		673 ± 14
52	29	29	4.4	1	1070	[1.75]		0.0645	3.3	0.1110	1.8		0.0508	8.1	0.1091	1.8		677 ± 12
53	74	47	10	0.63	1520	[1.23]		0.0658	2.1	0.1119	1.8		0.0561	4.7	0.1105	1.8		681 ± 12
54	110	34	15	0.3	6840	[0.27]		0.06295	1.5	0.1120	2.1		--	--	--	--		684 ± 14
55	93	70	14	0.75	2710	[0.69]		0.06470	1.4	0.1136	1.8		0.0593	2.4	0.1128	1.8		692 ± 12
56	75	50	11	0.66	725	[2.58]	-17	0.0771	3.5	0.1167	2.1		0.0570	9.1	0.1137	2.1
57	52	45	7.9	0.87	1520	[1.23]		0.0671	2.6	0.1152	1.8		0.0576	4.6	0.1138	1.8		699 ± 12
58	80	48	12	0.6	3500	[0.53]		0.0640	1.7	0.1196	2.1		0.0598	2.5	0.1190	2.1		728 ± 15
59	52	32	8	0.61	480	[3.89]		0.0690	4.5	0.1206	2.2		0.0380	21.	0.1159	2.2		729 ± 16
60	170	84	25	0.51	10600	[0.18]		0.06308	1.3	0.1217	1.8		--	--	--	--		741 ± 13
61	68	60	12	0.89	426	[4.39]	-11.5	0.0771	3.7	0.1245	2.2		0.0423	19.	0.1191	2.3
62	95	69	15	0.72	4870	[0.38]		0.06502	1.5	0.1226	1.8		0.0620	1.9	0.1222	1.8		745 ± 13
63	28	16	4.4	0.57	1870	[1.00]		0.0638	2.6	0.1224	1.8		--	--	--	--		745 ± 13
64	79	42	13	0.53	6720	[0.28]		0.0660	1.6	0.1368	2.1		--	--	--	--		827 ± 17
65	67	52	13	0.78	2210	[0.84]		0.0711	1.7	0.1524	1.8		0.0646	2.7	0.1511	1.8		913 ± 16
VP04-020, Novaya Zemlya oxidized sandstone at the unconformity (N. Lat. 70°32.689, E. Long. 056°36.823)
1	59	220	3.2	3.7	2340	[0.80]	-64	0.200	6.3	0.0414	2.5		--	--	--	--
2	160	51	15	0.32	1920	[0.97]	-16.8	0.0630	1.7	0.0793	2.2		0.0554	2.8	0.0785	2.2
3	1100	310	160	0.28	34.9	[53.60]	-39.3	0.196	10.	0.0969	2.2		--	--	--	--
4	120	76	12	0.62	4700	[0.40]	-2	0.05944	1.4	0.07977	1.2		--	--	--	--		493 ± 6
5	200	77	19	0.38	7860	[0.24]		0.05737	1.6	0.0800	1.8		--	--	--	--		496 ± 9
6	530	510	59	0.96	3360	[0.56]	-10.9	0.06033	0.88	0.0804	1.8		0.05599	1.4	0.0800	1.8
7	140	32	13	0.22	6310	[0.30]		0.05597	1.3	0.08056	1.2		--	--	--	--		500 ± 6
8	3000	3100	330	1	12700	[0.15]	-3	0.05821	0.31	0.08095	1.2		0.05706	0.35	0.08083	1.2		501 ± 6
9	520	300	52	0.58	9570	[0.20]		0.05783	0.66	0.08107	1.2		0.05631	0.77	0.08091	1.2		502 ± 6
10	250	77	23	0.31	7960	[0.23]		0.05735	0.97	0.08117	1.2		0.05551	1.2	0.08098	1.2		503 ± 6
11	580	300	58	0.52	9740	[0.19]		0.05818	0.66	0.08203	1.2		0.05669	0.77	0.08187	1.2		508 ± 6
12	480	140	45	0.29	20200	[0.09]		0.05760	1.0	0.0828	2.2		--	--	--	--		513 ± 11
13	190	22	17	0.12	5150	[0.36]		0.05913	1.1	0.0831	1.2		0.05629	1.5	0.0828	1.2		513 ± 6
14	500	120	47	0.25	8030	[0.23]		0.05825	0.66	0.0836	1.2		0.05643	0.80	0.0834	1.2		517 ± 6
15	320	100	31	0.32	38600	[0.05]		0.05883	1.3	0.0840	1.8		--	--	--	--		520 ± 9
16	55	38	6	0.69	1640	[1.14]	-27.1	0.0683	1.9	0.0856	1.2		0.0595	3.8	0.0846	1.2
17	390	230	40	0.6	16300	[0.11]		0.05879	1.0	0.0848	2.2		--	--	--	--		524 ± 11
18	420	140	42	0.33	9870	[0.19]		0.05837	0.99	0.0848	1.8		0.05689	1.2	0.0847	1.8		525 ± 9
19	410	110	40	0.26	6570	[0.28]		0.05920	0.96	0.0854	1.8		0.05698	1.2	0.0851	1.8		527 ± 9
20	320	95	32	0.29	6500	[0.29]		0.05879	0.82	0.0855	1.2		0.05655	1.1	0.0852	1.2		528 ± 6
21	440	94	43	0.21	8900	[0.21]	-0.7	0.05914	0.67	0.0857	1.2		0.05750	0.84	0.0855	1.2		529 ± 6
22	280	42	26	0.15	9850	[0.19]		0.05797	0.86	0.0855	1.2		--	--	--	--		529 ± 6
23	450	130	44	0.28	35100	[0.05]		0.05741	0.90	0.0856	2.2		--	--	--	--		530 ± 11
24	330	410	41	1.2	7070	[0.26]		0.05792	0.82	0.0859	1.2		0.05586	1.0	0.0856	1.2		531 ± 6
25	270	68	26	0.26	7780	[0.24]		0.05749	0.96	0.0861	1.2		0.05562	1.2	0.0858	1.2		533 ± 6
26	1200	1200	140	1	3910	[0.48]	-14.1	0.06240	0.56	0.0899	2.2		0.05868	0.77	0.0895	2.2
27	290	80	30	0.27	20100	[0.09]		0.05803	1.1	0.0908	2.2		--		--			561 ± 12
28	66	32	7.6	0.49	1880	[0.99]		0.0608	2.5	0.0936	1.8		0.0531	4.7	0.0927	1.8		576 ± 10
29	79	37	9	0.47	5150	[0.36]		0.0605	2.4	0.0938	1.8		--	--	--	--		577 ± 10
30	220	84	24	0.39	11000	[0.17]		0.05913	0.95	0.0938	1.2		--	--	--	--		578 ± 7
31	98	51	11	0.52	14100	[0.13]		0.0622	1.9	0.0962	2.2		--	--	--	--		590 ± 13
32	260	180	31	0.69	15100	[0.12]		0.06144	1.3	0.0962	2.2		--	--	--	--		591 ± 13
33	290	160	34	0.55	5680	[0.33]		0.06153	1.2	0.0964	1.8		0.05898	1.5	0.0960	1.8		592 ± 10
34	250	130	29	0.54	5660	[0.33]		0.06107	0.91	0.0966	1.2		0.05850	1.2	0.0963	1.2		594 ± 7
35	520	360	65	0.69	7300	[0.26]		0.06011	0.68	0.0970	1.2		0.05812	0.81	0.0967	1.2		596 ± 7
36	230	190	28	0.84	22600	[0.08]		0.05999	1.2	0.0974	2.2		--	--	--	--		599 ± 13
37	420	190	49	0.47	7710	[0.24]		0.06113	1.2	0.0976	1.8		0.05924	1.4	0.0974	1.8		599 ± 10
38	32	4.5	3.5	0.14	1120	[1.66]		0.0633	3.2	0.0979	1.8		0.0503	7.7	0.0963	1.8		600 ± 11
39	240	100	29	0.42	3490	[0.54]		0.06122	1.3	0.0976	1.8		0.0570	1.8	0.0971	1.8		600 ± 11
40	360	240	44	0.66	2790	[0.67]	-14.2	0.06487	0.96	0.0982	2.2		0.05967	1.5	0.0975	2.2
41	240	140	29	0.59	2600	[0.72]	-3.4	0.06220	0.97	0.0979	1.2		0.0566	1.8	0.0972	1.2		601 ± 7
42	710	340	83	0.48	24400	[0.08]		0.05927	0.76	0.0978	1.8		0.05867	0.81	0.0977	1.8		602 ± 10
43	230	110	27	0.46	5610	[0.33]	-1.7	0.06232	1.2	0.0983	1.8		0.05974	1.6	0.0980	1.8		603 ± 11
44	630	420	77	0.66	33500	[0.06]		0.06002	0.71	0.0985	2.2		--	--	--	--		605 ± 13
45	550	280	66	0.5	12600	[0.15]		0.06000	0.85	0.0986	1.8		0.05885	0.95	0.0985	1.8		606 ± 11
46	220	150	28	0.66	17700	[0.11]		0.06015	0.89	0.0991	1.2		--	--	--	--		609 ± 7
47	540	240	64	0.45	34600	[0.05]		0.06075	0.56	0.0992	1.2		--	--	--	--		609 ± 7
48	920	530	110	0.58	26700	[0.07]		0.05907	0.67	0.0992	1.8		0.05853	0.71	0.0991	1.8		610 ± 11
49	340	200	42	0.6	15500	[0.12]		0.06086	0.73	0.0996	1.2		--	--	--	--		612 ± 7
50	270	170	33	0.61	9560	[0.20]		0.06137	1.1	0.0997	2.2		0.05985	1.2	0.0995	2.2		612 ± 13
51	250	140	30	0.58	6830	[0.27]		0.06004	0.89	0.0996	1.2		0.05791	1.2	0.0993	1.2		612 ± 7
52	290	280	38	0.97	7700	[0.24]		0.06174	1.0	0.1005	2.2		0.05986	1.2	0.1002	2.2		616 ± 13
53	53	24	6.5	0.46	2130	[0.88]	-6.6	0.0659	2.2	0.1010	1.2		0.0591	3.3	0.1002	1.2		616 ± 7
54	130	95	16	0.75	6360	[0.29]		0.0605	1.7	0.1004	1.8		--	--	--	--		617 ± 11
55	1000	730	120	0.73	27700	[0.07]		0.06070	0.58	0.1005	2.2		0.06018	0.62	0.1004	2.2		617 ± 13
56	490	580	71	1.2	23800	[0.08]		0.05939	1.1	0.1003	1.8		0.05877	1.2	0.1002	1.8		617 ± 11
57	200	120	25	0.6	25400	[0.07]		0.06003	1.4	0.1006	1.8		--	--	--	--		618 ± 11
58	320	170	40	0.51	5370	[0.35]		0.06078	0.89	0.1008	1.2		0.05808	1.1	0.1004	1.2		619 ± 7
59	84	89	11	1.1	2570	[0.73]		0.0619	1.9	0.1016	2.2		0.0562	2.9	0.1009	2.2		623 ± 13
60	900	430	110	0.48	26000	[0.07]		0.06024	0.64	0.1022	1.8		0.05968	0.68	0.1021	1.8		628 ± 11
61	220	240	32	1.1	2550	[0.73]	-3.7	0.06403	1.3	0.1046	1.8		0.0583	2.0	0.1038	1.8		639 ± 11
62	64	46	8.6	0.71	2190	[0.85]		0.0633	2.1	0.1046	1.2		0.0566	3.2	0.1037	1.2		639 ± 8
63	35	62	5.6	1.8	1410	[1.32]	-5.5	0.0678	2.7	0.1063	2.2		0.0575	5.3	0.1049	2.2		646 ± 14
64	78	41	10	0.52	1810	[1.03]	-4.3	0.06474	1.4	0.1062	1.2		0.0567	2.9	0.1051	1.2		648 ± 8
65	37	27	5.2	0.73	2670	[0.70]	-0.2	0.0667	2.9	0.1069	1.8		--	--	--	--		650 ± 11
66	62	91	9.4	1.5	4830	[0.39]		0.0611	2.1	0.1062	2.2		--	--	--	--		651 ± 14
67	67	40	9	0.59	3060	[0.61]		0.06319	1.5	0.1069	1.2		0.0584	2.4	0.1063	1.2		654 ± 8
68	110	98	16	0.89	5750	[0.33]		0.0645	1.9	0.1072	1.8		--	--	--	--		654 ± 11
69	56	27	7.5	0.49	1070	[1.75]	-12.9	0.0699	2.4	0.1080	1.8		0.0562	5.4	0.1061	1.8
70	190	150	27	0.79	2700	[0.69]	-0.2	0.06403	1.4	0.1073	1.8		0.0587	2.3	0.1065	1.8		655 ± 11
71	63	39	8.3	0.62	3850	[0.49]		0.0615	2.5	0.1088	2.2		--	--	--	--		666 ± 14
72	83	76	13	0.92	1530	[1.22]		0.0650	2.0	0.1111	1.8		0.0555	4.0	0.1098	1.8		677 ± 12
73	54	33	7.8	0.6	1930	[0.97]	-1.3	0.0662	1.8	0.1140	1.2		0.0586	2.9	0.1129	1.2		693 ± 8
74	100	93	15	0.92	7060	[0.26]		0.0619	1.9	0.1148	2.2		--	--	--	--		702 ± 15
75	36	20	5	0.55	1790	[1.05]		0.0661	2.6	0.1158	2.2		0.0580	4.6	0.1146	2.2		704 ± 15
76	210	170	34	0.82	7900	[0.24]		0.06450	0.82	0.1204	1.2		0.06267	1.0	0.1201	1.2		732 ± 9
77	26	7.5	3.6	0.28	1970	[0.95]		0.0637	3.0	0.1208	2.2		--	--	--	--		735 ± 16
78	400	380	67	0.94	5310	[0.35]		0.06409	0.80	0.1232	1.8		0.06137	1.0	0.1228	1.8		749 ± 13
79	220	240	37	1.1	13700	[0.14]		0.06450	1.4	0.1234	1.8		--	--	--	--		750 ± 13
80	54	37	8.9	0.69	4740	[0.39]		0.0659	2.0	0.1325	2.2		--	--	--	--		802 ± 17
81	260	150	43	0.59	6440	[0.29]		0.06707	0.89	0.1357	1.3		0.06483	1.1	0.1353	1.3		820 ± 10
82	260	130	46	0.52	10900	[0.17]		0.06822	0.67	0.1461	1.2		0.06690	0.76	0.1459	1.2		879 ± 10
83	160	53	38	0.34	8610	[0.22]		0.08220	0.72	0.2086	1.2		0.08056	0.80	0.2081	1.2		1250 ± 14
84	120	39	46	0.32	10800	[0.17]		0.10515	0.54	0.3111	1.2		0.10388	0.58	0.3105	1.2		1717 ± 10
85	170	96	68	0.57	14500	[0.13]		0.10776	0.49	0.3180	1.2		0.10682	0.52	0.3176	1.2		1762 ± 9
86	38	26	17	0.68	5140	[0.36]		0.1109	1.5	0.3365	1.8		0.1083	1.8	0.3353	1.8		1814 ± 28
87	120	81	52	0.67	6400	[0.29]		0.11474	0.77	0.3395	2.2		0.11263	0.84	0.3385	2.2		1876 ± 14
VP04-021, Novaya Zemlya calcareous sandstone above the unconformity (N. Lat. 70°32.636, E. Long. 056°36.148)
1	310	160	29	0.52	20400	0.09		0.05609	1.4	0.0788	1.5		0.05538	1.5	0.0787	1.5		490 ± 7
2	290	91	26	0.31	18000	0.1		0.05691	1.6	0.0790	1.5		0.05610	1.7	0.0789	1.5		490 ± 7
3	160	76	15	0.49	10900	0.17		0.0565	1.8	0.0794	1.5		0.0551	2.0	0.0793	1.5		493 ± 7
4	220	140	22	0.63	16000	0.12		0.05610	1.5	0.0795	1.5		0.05519	1.6	0.0794	1.5		494 ± 7
5	210	110	21	0.54	23100	[0.08]		0.05805	1.5	0.0798	1.5		--	--	--	--		495 ± 7
6	160	68	15	0.43	26000	[0.07]		0.05731	1.4	0.0799	1.5		--	--	--	--		495 ± 7
7	170	73	16	0.42	9200	0.2		0.05755	1.5	0.08051	0.98		0.0560	1.8	0.08034	0.98		499 ± 5
8	180	130	18	0.73	19700	[0.09]		0.0567	1.9	0.0805	1.5		--	--	--	--		499 ± 7
9	67	38	6.7	0.57	9720	0.19		0.0568	2.6	0.08058	0.97		0.0553	3.0	0.08043	0.97		500 ± 5
10	250	91	24	0.37	7710	0.24		0.05854	1.4	0.0808	1.5		0.05665	1.7	0.0806	1.5		500 ± 7
11	470	190	44	0.4	1460	1.28		0.06882	0.80	0.08230	0.97		0.05890	1.5	0.08125	0.97		503 ± 5
12	220	48	20	0.22	102000	[0.02]		0.05592	1.5	0.08099	0.98		--	--	--	--		503 ± 5
13	250	200	26	0.79	15100	0.12		0.05732	1.5	0.08117	0.97		0.05636	1.6	0.08107	0.97		503 ± 5
14	500	140	47	0.29	4240	0.44		0.05899	1.1	0.0820	1.5		0.05555	1.5	0.0816	1.5		507 ± 8
15	230	85	22	0.36	14900	0.13		0.05752	1.5	0.0820	1.5		0.05655	1.6	0.0819	1.5		508 ± 7
16	180	3.6	16	0.02	13400	0.14		0.05726	1.4	0.0821	1.5		0.05618	1.6	0.0819	1.5		509 ± 8
17	340	80	31	0.24	31200	0.06		0.05717	1.3	0.0821	1.5		0.05670	1.3	0.0820	1.5		509 ± 8
18	150	65	15	0.44	16800	[0.11]		0.0598	1.7	0.0824	1.5		--	--	--	--		509 ± 8
19	430	300	45	0.68	28800	0.06	2.3	0.05625	0.95	0.08202	0.99		0.05575	1.0	0.08197	0.99		509 ± 5
20	330	75	31	0.23	2300	0.81		0.06170	1.3	0.08261	0.97		0.0554	2.1	0.08194	0.97		509 ± 5
21	170	70	17	0.42	41300	[0.05]		0.0592	2.0	0.0824	1.5		--	--	--	--		509 ± 8
22	340	48	31	0.14	2460	0.76		0.06134	1.2	0.0828	1.5		0.0554	1.9	0.0822	1.5		510 ± 8
23	190	66	18	0.35	18100	0.1		0.05812	1.7	0.08263	1.0		0.0573	1.8	0.08254	1.0		511 ± 5
24	330	72	31	0.22	20900	0.09		0.05703	1.2	0.08302	0.97		0.05634	1.2	0.08294	0.97		514 ± 5
25	270	40	25	0.15	8610	0.22		0.05752	1.2	0.08320	0.97		0.05583	1.5	0.08302	0.97		515 ± 5
26	190	87	20	0.45	14400	[0.13]		0.05846	1.7	0.0833	1.5		--	--	--	--		515 ± 8
27	190	72	19	0.37	17900	0.1		0.05791	1.5	0.08358	0.97		0.05710	1.6	0.08349	0.97		517 ± 5
28	720	220	70	0.31	82100	[0.02]		0.05778	0.86	0.0836	1.5		--	--	--	--		518 ± 8
29	140	66	14	0.49	14800	[0.13]		0.0587	2.4	0.0837	1.5		--	--	--	--		518 ± 8
30	150	46	15	0.3	12900	0.15		0.0594	1.8	0.0840	1.5		0.0583	2.0	0.0838	1.5		519 ± 8
31	79	54	8.4	0.69	>1e6	[0.00]		0.0576	2.5	0.0838	1.5		--	--	--	--		519 ± 8
32	260	17	24	0.064	38100	[0.05]		0.05753	1.6	0.0841	1.5		--	--	--	--		521 ± 8
33	140	36	13	0.26	5460	0.34	24.3	0.0550	1.9	0.0840	1.5		0.0523	2.4	0.0837	1.5
34	480	180	48	0.38	38500	0.05		0.05767	1.0	0.0844	1.5		0.05729	1.1	0.0843	1.5		522 ± 8
35	140	48	14	0.34	7840	0.24		0.0573	2.4	0.0858	1.5		0.0555	2.8	0.0855	1.5		531 ± 8
36	320	94	32	0.29	27400	0.07	3.9	0.05637	1.2	0.08578	0.97		0.05584	1.3	0.08572	0.97		532 ± 5
37	190	93	20	0.49	28400	0.07		0.05807	1.6	0.08642	1.0		0.05755	1.7	0.08636	1.0		534 ± 5
38	140	99	15	0.73	3790	0.49		0.0611	1.7	0.08742	0.98		0.0573	2.4	0.08699	0.98		538 ± 5
39	400	74	39	0.19	24400	0.08	1.1	0.05682	1.3	0.0873	1.6		0.05622	1.3	0.0873	1.6		541 ± 8
40	100	42	10	0.42	7170	0.26		0.0579	1.9	0.0886	1.5		0.0559	2.3	0.0884	1.5		548 ± 8
41	430	97	43	0.23	>1e6	[0.00]		0.05930	1.0	0.0891	1.5		--	--	--	--		550 ± 8
42	270	69	28	0.26	28800	0.06		0.05908	1.2	0.0905	1.5		0.05857	1.2	0.0905	1.5		558 ± 8
43	220	120	25	0.55	21300	0.09		0.05871	1.4	0.0906	1.5		0.05802	1.5	0.0906	1.5		559 ± 8
44	130	30	13	0.23	10300	0.18		0.0579	2.1	0.09056	0.98		0.0565	2.4	0.09039	0.98		559 ± 5
45	200	190	25	0.95	14000	0.13		0.05801	1.4	0.0918	1.5		0.05697	1.6	0.0916	1.5		567 ± 9
46	190	130	23	0.67	>1e6	[0.00]		0.05798	1.5	0.09351	0.98		--	--	--	--		577 ± 6
47	340	81	36	0.24	8720	0.21		0.05939	0.96	0.09389	0.97		0.05772	1.1	0.09368	0.97		578 ± 5
48	150	18	15	0.12	5200	0.36	0.6	0.0583	2.1	0.0938	1.5		0.0555	2.6	0.0935	1.5		579 ± 9
49	70	22	7.6	0.31	20400	[0.09]		0.0589	2.5	0.0941	1.5		--	--	--	--		580 ± 9
50	150	110	19	0.75	28100	0.07		0.06005	1.5	0.09718	0.97		0.05953	1.6	0.09712	0.97		598 ± 6
51	580	420	73	0.73	42500	0.04		0.05958	0.81	0.0976	1.5		0.05924	0.84	0.0975	1.5		600 ± 9
52	56	14	6	0.25	1800	1.04		0.0601	2.9	0.0980	1.5		0.0520	4.8	0.0970	1.5		602 ± 9
53	90	110	13	1.2	9810	0.19		0.0591	1.8	0.0993	1.5		0.0576	2.1	0.0991	1.5		611 ± 9
54	220	150	28	0.67	13400	0.14		0.05950	1.4	0.1004	1.5		0.05841	1.6	0.1003	1.5		618 ± 9
55	280	120	34	0.44	17500	0.11		0.06006	1.3	0.1012	1.5		0.05924	1.4	0.1011	1.5		622 ± 9
56	360	180	45	0.5	17000	0.11	3	0.05917	1.1	0.1016	1.5		0.05832	1.2	0.1014	1.5		625 ± 9
57	200	120	26	0.6	21100	0.09	1.9	0.05923	1.2	0.1029	1.5		0.05854	1.2	0.1028	1.5		632 ± 9
58	260	200	37	0.77	8710	0.21		0.06220	1.2	0.1110	1.5		0.06053	1.4	0.1108	1.5		678 ± 10
59	130	74	18	0.57	11300	0.17		0.0634	1.6	0.1131	1.5		0.0622	1.8	0.1129	1.5		690 ± 10
60	340	230	51	0.66	21500	0.09		0.06167	1.1	0.1156	1.5		0.06099	1.1	0.1155	1.5		707 ± 10
61	97	98	16	1	15000	[0.12]		0.0632	1.8	0.1203	1.5		--	--	--	--		733 ± 11
62	55	34	8.3	0.62	957	1.95		0.0783	1.9	0.1276	0.97		0.0632	4.0	0.1251	0.97		761 ± 8
63	150	75	24	0.49	261	7.18	53.1	0.0951	1.3	0.1476	0.97		0.0379	10.	0.1370	0.97
64	94	35	18	0.37	7490	0.25		0.06995	1.4	0.1610	0.99		0.0680	1.6	0.1606	0.99		964 ± 9
65	280	99	55	0.36	20400	0.09		0.07314	0.75	0.1684	1.5		0.07244	0.81	0.1683	1.5		1003 ± 15
66	440	360	150	0.84	4410	0.42	25.3	0.11789	0.40	0.2451	0.98		0.11483	0.46	0.2441	0.98
67	110	65	35	0.59	18600	0.1		0.09136	0.92	0.2463	0.98		0.09061	0.97	0.2461	0.98		1438 ± 18
68	110	63	31	0.58	10900	0.17	-5.8	0.09299	0.93	0.2248	1.5		0.09171	1.0	0.2244	1.5		1461 ± 20
69	75	70	28	0.93	10600	0.18		0.09372	1.0	0.2696	0.97		0.0924	1.1	0.2691	0.97		1476 ± 21
70	63	59	23	0.94	18300	0.1		0.0944	1.2	0.2630	0.99		0.0936	1.2	0.2628	0.99		1500 ± 23
71	110	61	43	0.56	4280	0.44	4.3	0.10051	0.99	0.3075	0.97		0.0973	1.2	0.3062	0.97		1573 ± 22
72	230	42	74	0.18	52500	0.04	-0.6	0.10191	0.80	0.2769	1.5		0.10165	0.81	0.2768	1.5		1654 ± 15
73	270	110	98	0.42	60100	0.03		0.11007	0.47	0.2916	1.5		0.10984	0.47	0.2915	1.5		1797 ± 9
74	460	220	200	0.48	18300	0.1		0.11510	0.45	0.3459	1.5		0.11436	0.46	0.3455	1.5		1870 ± 8
75	50	47	25	0.93	31200	0.06	-1.3	0.1213	1.1	0.3623	1.0		0.1209	1.1	0.3621	1.0		1969 ± 19
76	38	36	24	0.93	19500	0.1		0.1536	1.3	0.4422	0.97		0.1529	1.3	0.4418	0.97		2379 ± 22
77	76	95	55	1.3	11600	0.16		0.1697	0.75	0.4816	1.0		0.1686	0.77	0.4809	1.0		2544 ± 13
VP98-009, Taimyr western meta-psamite (N. Lat. 75°11.62, E. Long. 092°31.53)
1	490	110	39	0.23	6370	0.29		0.05681	0.92	0.0708	2.1		0.05452	1.2	0.0705	2.1		440 ± 9
2	360	36	29	0.1	18400	[0.10]		0.05727	0.97	0.0739	2.0		--	--	--	--		459 ± 9
3	3100	2500	310	0.81	20000	0.09		0.05737	1.0	0.0740	4.7		0.05664	1.1	0.0740	4.7		460 ± 21
4	210	62	18	0.3	9160	[0.20]		0.05705	1.3	0.0772	2.0		--	--	--	--		479 ± 10
5	1500	540	140	0.35	5830	0.32		0.05968	0.48	0.0785	2.0		0.05718	0.62	0.0783	2.0		486 ± 10
6	240	79	22	0.33	10700	[0.18]		0.05787	1.2	0.0788	2.0		--	--	--	--		488 ± 10
7	82	22	7.5	0.26	3530	0.53		0.0639	1.6	0.0799	2.1		0.0598	2.0	0.0795	2.1		491 ± 10
8	620	130	57	0.2	134000	[0.01]		0.05783	0.47	0.08118	1.2		--	--	--	--		503 ± 6
9	230	47	21	0.2	15000	[0.12]		0.05837	1.2	0.0813	2.1		--	--	--	--		503 ± 10
10	490	110	45	0.24	22600	[0.08]		0.05705	0.77	0.0814	2.0		--	--	--	--		505 ± 10
11	190	40	18	0.21	7600	[0.25]	-5.9	0.06027	1.3	0.0815	2.1		--	--	--	--		503 ± 10
12	750	120	67	0.16	17400	0.11		0.05808	0.65	0.0817	2.0		0.05724	0.71	0.0816	2.0		506 ± 10
13	210	42	19	0.2	15600	[0.12]		0.05627	1.2	0.0816	2.0		--	--	--	--		506 ± 10
14	330	88	31	0.27	25800	[0.07]		0.05826	0.93	0.0820	2.0		--	--	--	--		507 ± 10
15	730	170	68	0.23	47400	[0.04]	-1.3	0.05874	0.63	0.0825	2.0		--	--	--	--		510 ± 10
16	240	58	23	0.24	12300	[0.15]		0.05679	1.1	0.0827	2.1		--	--	--	--		513 ± 10
17	4500	1300	430	0.28	19800	0.09		0.05838	0.18	0.08285	1.1		0.05764	0.22	0.08277	1.1		513 ± 6
18	580	220	57	0.37	22000	[0.09]	-2.6	0.05915	0.73	0.0829	2.1		--	--	--	--		512 ± 10
19	230	53	21	0.23	24100	[0.08]		0.05747	1.2	0.0829	2.0		--	--	--	--		513 ± 10
20	660	180	63	0.28	22900	0.08		0.05743	0.68	0.0830	2.0		0.05679	0.73	0.0830	2.0		514 ± 10
21	2200	390	200	0.18	16500	0.11		0.05817	0.38	0.0831	2.1		0.05729	0.42	0.0830	2.1		514 ± 10
22	2600	780	250	0.31	20100	0.09		0.05855	0.24	0.08309	1.2		0.05783	0.26	0.08301	1.2		514 ± 6
23	270	46	25	0.17	15100	[0.12]		0.05833	1.3	0.0831	2.0		--	--	--	--		514 ± 10
24	240	98	24	0.4	22600	0.08	-0.5	0.05964	0.78	0.0835	1.3		0.05900	0.84	0.0834	1.3		516 ± 7
25	350	91	34	0.26	5610	0.33		0.05828	1.1	0.0837	2.0		0.05568	1.4	0.0834	2.0		518 ± 10
26	240	49	22	0.21	24100	0.08		0.05739	0.75	0.0836	1.3		0.05679	0.80	0.0835	1.3		517 ± 7
27	460	80	43	0.17	109000	[0.02]		0.05778	0.59	0.0837	1.3		--	--	--	--		518 ± 7
28	3700	1100	360	0.29	85200	0.02		0.05766	0.31	0.0842	2.1		0.05749	0.31	0.0842	2.1		521 ± 10
29	2100	640	210	0.3	36500	0.05		0.05790	0.45	0.0844	2.0		0.05751	0.47	0.0844	2.0		522 ± 10
30	970	290	94	0.3	28400	0.07		0.05743	0.54	0.0847	2.0		0.05692	0.58	0.0846	2.0		524 ± 10
31	560	120	53	0.22	109000	[0.02]		0.05778	0.49	0.0848	1.3		--	--	--	--		525 ± 7
32	250	71	24	0.29	105000	[0.02]		0.05759	0.80	0.0851	1.2		--	--	--	--		527 ± 6
33	130	38	13	0.29	6300	0.3		0.05854	1.0	0.0853	1.2		0.05623	1.2	0.0851	1.2		528 ± 6
34	410	190	41	0.48	8080	0.23		0.05819	0.87	0.0853	2.1		0.05639	1.1	0.0851	2.1		527 ± 11
35	550	200	55	0.36	56500	[0.03]		0.05831	0.89	0.0852	2.0		--	--	--	--		527 ± 11
36	230	78	23	0.34	15100	[0.12]		0.05836	1.3	0.0855	2.1		--	--	--	--		529 ± 11
37	300	83	30	0.28	30100	0.06		0.05869	0.67	0.0865	1.3		0.05821	0.71	0.0864	1.3		534 ± 7
38	110	30	11	0.28	6100	[0.31]	-3.8	0.0615	1.6	0.0869	2.0		--	--	--	--		535 ± 11
39	620	320	66	0.52	31800	[0.06]		0.05765	0.68	0.0872	2.1		--	--	--	--		539 ± 11
40	1100	360	120	0.31	13000	0.14		0.05924	0.33	0.0878	1.2		0.05812	0.38	0.0877	1.2		542 ± 7
41	270	65	27	0.24	8610	0.22		0.05937	1.0	0.0882	2.1		0.05768	1.2	0.0880	2.1		544 ± 11
42	190	96	20	0.51	11100	[0.17]		0.0594	1.7	0.0880	2.1		--	--	--	--		543 ± 11
43	380	48	36	0.13	13000	0.14		0.06001	0.85	0.0883	2.1		0.05890	0.96	0.0881	2.1		544 ± 11
44	170	47	17	0.28	10100	[0.19]		0.05799	1.3	0.0882	2.1		--	--	--	--		545 ± 11
45	1900	310	190	0.16	101000	[0.02]		0.05879	0.42	0.0891	2.1		--	--	--	--		550 ± 11
46	120	31	12	0.26	6180	[0.30]		0.05862	1.5	0.0897	2.0		--	--	--	--		554 ± 11
47	160	44	16	0.29	15100	[0.12]		0.05801	1.3	0.0898	2.0		--	--	--	--		555 ± 11
48	790	170	79	0.21	34300	[0.05]		0.05875	0.61	0.0899	2.1		--	--	--	--		555 ± 11
49	3000	620	310	0.21	399000	0		0.05848	0.25	0.0910	1.3		0.05845	0.25	0.0910	1.3		562 ± 7
50	1400	320	150	0.23	98800	[0.02]		0.05910	0.45	0.0915	2.0		--	--	--	--		564 ± 11
51	110	32	12	0.28	10900	0.17		0.06022	1.0	0.0917	1.2		0.05890	1.2	0.0915	1.2		564 ± 7
52	110	23	12	0.2	10000	[0.19]		0.06034	1.6	0.0938	2.1		--	--	--	--		577 ± 12
53	170	71	19	0.43	40100	[0.05]		0.06035	0.83	0.0945	1.2		--	--	--	--		582 ± 7
54	380	160	43	0.41	13400	0.14		0.05935	0.86	0.0951	2.1		0.05827	0.96	0.0950	2.1		586 ± 12
55	230	91	26	0.4	28600	0.07		0.05956	0.73	0.0952	1.3		0.05905	0.77	0.0951	1.3		586 ± 7
56	120	76	16	0.63	8290	[0.23]		0.06255	1.4	0.1031	2.0		--	--	--	--		631 ± 13
57	2200	890	270	0.41	24600	0.08	-11.5	0.06480	0.34	0.1035	2.0		0.06421	0.36	0.1035	2.0
58	700	180	83	0.26	16100	0.12		0.06220	0.58	0.1061	1.2		0.06130	0.61	0.1060	1.2		649 ± 7
59	150	170	23	1.1	22800	0.08		0.06120	0.80	0.1065	1.2		0.06057	0.84	0.1064	1.2		652 ± 8
60	280	280	41	1	19000	[0.10]		0.06141	0.88	0.1065	2.0		--	--	--	--		653 ± 13
61	160	110	22	0.69	25300	[0.07]		0.06278	1.2	0.1095	2.0		--	--	--	--		669 ± 13
62	140	100	20	0.76	36800	[0.05]		0.06282	0.80	0.1132	1.1		--	--	--	--		691 ± 8
63	99	79	15	0.8	8860	0.21		0.06299	1.1	0.1139	1.2		0.06136	1.3	0.1137	1.2		695 ± 8
64	87	47	13	0.53	2860	0.65	2.5	0.06434	1.5	0.1195	2.1		0.0593	2.3	0.1187	2.1		727 ± 15
65	180	120	29	0.63	38700	[0.05]		0.06353	0.69	0.1228	1.3		--	--	--	--		747 ± 9
66	270	88	43	0.32	21800	[0.09]		0.06783	0.90	0.1327	2.0		--	--	--	--		801 ± 16
VP98-055,Taimyr eastern turbiditic sandstone (N. Lat. 77°42.83, E. Long. 104°18.09)
1	1400	790	130	0.58	297	6.3		0.1076	2.0	0.08474	1.1		0.0586	5.5	0.07940	1.1		491 ± 7
2	200	160	20	0.79	121	15.41		0.1778	4.9	0.0951	1.2		0.058	27.	0.08041	1.1
3	170	130	18	0.8	26600	0.07		0.05948	0.98	0.0835	1.2		0.05893	1.0	0.0834	1.2		516 ± 6
4	630	840	69	1.3	432	4.33		0.09179	0.57	0.0877	1.2		0.0581	2.4	0.08392	1.2		519 ± 7
5	190	42	18	0.22	36.1	51.8		0.455	2.6	0.1761	2.5		0.046	89.	0.0849	4.5
6	96	90	11	0.93	921	2.03		0.0747	2.3	0.08728	1.1		0.0589	3.8	0.08551	1.1		528 ± 6
7	600	220	60	0.37	5450	0.34		0.06144	0.45	0.0870	1.2		0.05877	0.62	0.0867	1.2		535 ± 6
8	1100	740	120	0.67	50000	0.04		0.05858	0.33	0.0870	1.2		0.05829	0.35	0.0869	1.2		537 ± 6
9	710	760	85	1.1	2610	0.72		0.06398	0.73	0.0876	1.3		0.05841	0.98	0.0870	1.3		537 ± 7
10	140	48	14	0.34	4710	0.4		0.06215	0.96	0.0874	1.2		0.05907	1.3	0.0870	1.2		537 ± 6
11	840	650	95	0.77	18500	0.1		0.05901	0.46	0.0871	1.3		0.05823	0.49	0.0870	1.3		538 ± 7
12	310	220	34	0.71	29500	0.06		0.05797	0.67	0.08728	1.1		0.05748	0.71	0.08723	1.1		540 ± 6
13	120	74	13	0.63	16900	[0.11]		0.05869	1.1	0.08758	1.1		--	--	--	--		541 ± 6
14	320	240	37	0.76	56800	[0.03]		0.05843	0.82	0.08784	1.1		--	--	--	--		543 ± 6
15	420	370	49	0.89	62300	[0.03]	3.4	0.05705	0.59	0.08787	1.1		--	--	--	--		544 ± 6
16	780	630	90	0.81	56400	0.03		0.05860	0.39	0.0879	1.3		0.05834	0.40	0.0879	1.3		543 ± 7
17	53	33	5.9	0.62	20300	[0.09]		0.05946	1.6	0.08806	1.1		--	--	--	--		543 ± 6
18	460	430	55	0.92	15600	0.12		0.05972	0.53	0.0884	1.2		0.05879	0.58	0.0883	1.2		545 ± 6
19	61	33	6.6	0.53	16300	[0.12]		0.05978	1.4	0.0885	1.2		--	--	--	--		546 ± 7
20	200	150	22	0.79	3570	0.52		0.06069	0.97	0.0893	1.2		0.05661	1.3	0.0888	1.2		550 ± 6
21	950	640	110	0.68	11800	0.16		0.05918	0.36	0.0890	1.2		0.05795	0.41	0.0889	1.2		549 ± 7
22	29	18	3.2	0.63	>1e6	[0.00]		0.0578	2.2	0.08899	1.1		--	--	--	--		550 ± 6
23	110	43	12	0.38	19300	[0.10]		0.05912	1.1	0.08902	1.1		--	--	--	--		549 ± 6
24	210	190	25	0.91	18000	0.1	2.2	0.05779	0.81	0.0891	1.2		0.05698	0.88	0.0890	1.2		551 ± 6
25	690	310	73	0.45	3390	0.55		0.06325	0.41	0.0895	1.2		0.05896	0.77	0.0891	1.2		550 ± 7
26	320	320	39	0.99	2520	0.74		0.06473	0.57	0.0897	1.2		0.05897	1.1	0.0891	1.2		550 ± 6
27	320	140	34	0.43	1320	1.41		0.06885	0.71	0.0904	1.1		0.05786	1.5	0.0891	1.1		551 ± 6
28	580	180	59	0.31	541	3.46		0.08576	1.0	0.0923	1.2		0.0589	2.6	0.0892	1.2		550 ± 7
29	160	160	20	1	48600	[0.04]		0.05891	1.2	0.0895	1.2		--	--	--	--		552 ± 7
30	22	8.5	2.4	0.38	13500	[0.14]	-5.8	0.0635	2.2	0.0897	1.2		--	--	--	--		551 ± 6
31	520	240	56	0.47	51900	0.04		0.05854	0.52	0.0899	1.3		0.05826	0.53	0.0899	1.3		555 ± 7
32	110	52	12	0.5	1760	1.06		0.0610	2.5	0.0922	1.6		0.0526	4.1	0.0912	1.6		567 ± 9
33	88	60	10	0.69	6380	[0.29]		0.0595	2.0	0.0914	1.5		--	--	--	--		563 ± 8
34	570	220	61	0.39	2510	0.75	1.8	0.06220	0.78	0.0922	1.5		0.05639	1.6	0.0915	1.5		566 ± 8
35	390	220	44	0.57	57900	[0.03]		0.05920	0.58	0.0915	1.2		--	--	--	--		564 ± 7
36	200	170	24	0.87	6050	0.31		0.05885	1.6	0.0919	1.5		0.0564	2.2	0.0916	1.5		567 ± 8
37	150	180	19	1.2	3110	0.6	28.7	0.05745	1.5	0.0922	1.7		0.0527	2.5	0.0916	1.7
38	580	530	72	0.92	5190	0.36		0.06049	0.70	0.0920	1.5		0.05769	1.1	0.0917	1.5		566 ± 8
39	200	150	23	0.77	7580	0.25	4.8	0.05802	1.3	0.0920	1.5		0.05610	1.6	0.0917	1.5		568 ± 8
40	180	94	21	0.51	26200	0.07		0.05922	0.96	0.0918	1.3		0.05867	1.0	0.0918	1.3		566 ± 7
41	140	100	17	0.74	1660	1.13		0.06608	1.4	0.0928	1.5		0.0573	3.0	0.0918	1.5		567 ± 9
42	210	100	23	0.49	1540	1.22		0.0669	2.1	0.0931	1.6		0.0575	3.3	0.0920	1.6		568 ± 9
43	220	210	28	0.96	34200	[0.05]		0.05935	0.97	0.0923	1.1		--	--	--	--		569 ± 6
44	52	24	5.8	0.46	13100	[0.14]		0.0598	1.7	0.0928	1.2		--	--	--	--		572 ± 7
45	120	150	17	1.2	72300	[0.03]		0.05934	1.0	0.0928	1.1		--	--	--	--		572 ± 6
46	620	290	69	0.47	27800	0.07		0.05888	0.48	0.0930	1.2		0.05836	0.50	0.0929	1.2		574 ± 7
47	160	140	20	0.86	6060	0.31		0.05977	1.5	0.0935	1.6		0.0574	1.9	0.0932	1.6		576 ± 9
48	410	340	50	0.83	14900	0.13	6.6	0.05780	0.93	0.0935	1.5		0.05682	1.1	0.0933	1.5		577 ± 9
49	120	94	14	0.81	45400	[0.04]		0.05832	1.3	0.0934	1.1		--	--	--	--		576 ± 6
50	160	200	21	1.2	3720	0.5	38.3	0.05537	1.8	0.0940	1.5		0.0514	2.8	0.0935	1.5
51	280	170	33	0.62	52200	[0.04]		0.05875	0.96	0.0935	1.5		--	--	--	--		577 ± 9
52	100	72	12	0.7	7260	[0.26]		0.0560	2.5	0.0939	1.5		--	--	--	--		581 ± 9
53	100	28	11	0.28	7710	[0.24]		0.05778	1.7	0.0940	1.6		--	--	--	--		580 ± 9
54	140	75	17	0.52	14900	[0.13]		0.05981	1.4	0.0943	1.5		--	--	--	--		581 ± 9
55	61	25	6.8	0.41	3490	0.54		0.06317	1.3	0.0963	1.2		0.0590	1.8	0.0957	1.2		590 ± 7
56	49	12	5.6	0.25	308000	[0.01]		0.05858	1.6	0.1010	1.1		--	--	--	--		622 ± 7
57	400	250	51	0.62	54700	0.03	1.3	0.05974	0.58	0.1022	1.2		0.05948	0.59	0.1022	1.2		628 ± 7
58	210	160	28	0.78	6090	0.31	9.4	0.05941	1.1	0.1035	1.5		0.05702	1.7	0.1032	1.5		636 ± 9
59	90	66	12	0.73	2580	0.73	20.6	0.0594	2.0	0.1043	1.6		0.0537	3.2	0.1036	1.6
60	58	26	7.4	0.44	2000	0.93		0.0624	3.0	0.1086	1.6		0.0551	5.1	0.1075	1.6		664 ± 10
61	57	25	7.3	0.44	2410	0.78	3.3	0.0607	2.7	0.1091	1.6		0.0546	4.1	0.1082	1.6		668 ± 10
62	170	150	25	0.92	465	4.02		0.08976	1.0	0.1163	1.5		0.0585	3.7	0.1116	1.5		685 ± 11
63	450	230	61	0.52	63500	0.03		0.06276	0.61	0.1122	1.1		0.06253	0.62	0.1122	1.1		685 ± 7
64	39	19	5.4	0.48	19000	[0.10]		0.0634	1.6	0.1124	1.1		--	--	--	--		686 ± 8
65	47	33	7.2	0.71	4860	[0.38]		0.0612	2.4	0.1192	1.5		--	--	--	--		728 ± 11
66	68	17	9.1	0.25	2410	0.78		0.0657	2.0	0.1210	1.5		0.0596	3.0	0.1201	1.5		735 ± 11
67	390	150	95	0.38	4000	0.47		0.08168	0.53	0.2037	1.5		0.07814	0.71	0.2027	1.5		1150 ± 14
VP98-078, Taimyr central turbiditic sandstone (N. Lat. 77°16.11, E. Long. 103°22.35)
1	460	380	49	0.83	737	2.54		0.0774	1.5	0.08286	1.1		0.0577	3.0	0.08076	1.1		500 ± 6
2	100	95	11	0.96	237	7.89		0.1168	4.0	0.0886	1.3		0.0552	15.	0.0816	1.4
3	62	39	6.7	0.63	423	4.42		0.0906	2.1	0.0895	1.2		0.0561	8.3	0.0855	1.2		530 ± 7
4	250	160	27	0.61	69700	[0.03]		0.05849	0.68	0.0855	1.2		--	--	--	--		529 ± 6
5	380	460	48	1.2	34900	0.05		0.05884	0.56	0.0868	1.2		0.05843	0.59	0.0868	1.2		536 ± 6
6	93	50	9.9	0.53	1700	1.1		0.0653	2.4	0.0880	1.4		0.0567	5.0	0.0870	1.4		539 ± 7
7	180	95	19	0.52	1500	1.25		0.05959	1.6	0.0886	2.0		0.0498	3.6	0.0875	2.0		546 ± 11
8	270	160	30	0.59	3110	0.6		0.06472	1.2	0.0881	1.2		0.0601	2.1	0.0876	1.2		540 ± 7
9	420	350	48	0.82	63300	0.03	0.8	0.05762	0.53	0.08765	1.1		0.05739	0.54	0.08763	1.1		542 ± 6
10	96	85	11	0.89	9240	[0.20]		0.0609	2.3	0.0876	1.3		--	--	--	--		540 ± 7
11	130	60	14	0.47	74600	[0.03]		0.05928	0.98	0.0877	1.2		--	--	--	--		541 ± 7
12	47	26	5	0.55	6840	0.27		0.05930	1.6	0.0879	1.2		0.0572	1.9	0.0877	1.2		543 ± 6
13	130	110	15	0.88	50900	[0.04]		0.05863	1.0	0.0878	1.1		--	--	--	--		542 ± 6
14	140	96	15	0.7	20100	0.09		0.05879	0.96	0.0880	1.2		0.05807	1.0	0.0879	1.2		543 ± 6
15	52	22	5.4	0.42	1070	1.74		0.0641	2.9	0.0896	1.3		0.0504	7.3	0.0880	1.3		549 ± 7
16	140	93	16	0.65	24300	[0.08]		0.05880	1.5	0.0881	2.1		--	--	--	--		544 ± 11
17	720	590	82	0.83	5470	0.34	2.5	0.05869	1.1	0.0884	1.2		0.05602	1.5	0.0881	1.2		546 ± 7
18	110	56	12	0.51	19100	[0.10]		0.05879	1.1	0.08812	1.1		--	--	--	--		544 ± 6
19	320	100	33	0.32	58900	[0.03]		0.05905	0.67	0.08814	1.1		--	--	--	--		544 ± 6
20	700	600	81	0.86	529	3.54		0.0834	1.2	0.0915	1.2		0.0558	3.4	0.0883	1.2		547 ± 7
21	1200	480	130	0.39	59300	0.03		0.05875	0.51	0.0885	1.2		0.05851	0.51	0.0885	1.2		547 ± 6
22	490	500	59	1	14900	0.13		0.05766	1.3	0.0888	1.2		0.05668	1.4	0.0887	1.2		549 ± 6
23	190	130	21	0.66	325	5.76		0.1031	4.0	0.0941	2.1		0.0583	10.	0.0887	2.1
24	480	320	54	0.68	37600	0.05		0.05885	0.52	0.0889	1.2		0.05846	0.55	0.0889	1.2		549 ± 6
25	31	20	3.5	0.63	8210	[0.23]		0.0588	2.0	0.0892	1.3		--	--	--	--		551 ± 7
26	130	94	15	0.7	2260	0.83		0.06389	1.0	0.0899	1.2		0.0574	1.9	0.0892	1.2		552 ± 6
27	170	120	19	0.73	818	2.29		0.07645	1.3	0.0913	1.2		0.0587	3.7	0.0892	1.2		551 ± 7
28	180	120	20	0.67	13600	[0.14]		0.05993	1.6	0.0893	2.1		--	--	--	--		551 ± 11
29	130	75	14	0.59	54300	[0.03]		0.05878	1.0	0.0894	1.2		--	--	--	--		552 ± 7
30	330	200	36	0.61	22700	0.08		0.05893	0.90	0.0896	1.2		0.05829	0.94	0.0895	1.2		553 ± 7
31	210	130	23	0.64	33100	[0.06]		0.05799	0.77	0.0896	1.2		--	--	--	--		553 ± 6
32	170	67	18	0.39	618	3.02		0.0839	3.7	0.0924	1.2		0.0605	9.7	0.0896	1.2		552 ± 7
33	17	6.7	1.8	0.4	4000	[0.47]		0.0563	6.0	0.0897	1.2		--	--	--	--		555 ± 7
34	170	150	21	0.89	12600	[0.15]		0.05796	1.4	0.0899	2.0		--	--	--	--		556 ± 11
35	460	340	51	0.73	436	4.29		0.0939	2.0	0.0942	1.2		0.0607	4.3	0.0902	1.2		555 ± 7
36	72	44	8.1	0.62	17200	[0.11]		0.05952	1.4	0.0902	1.1		--	--	--	--		556 ± 6
37	69	17	7.1	0.25	12900	[0.15]		0.05983	1.3	0.0903	1.1		--	--	--	--		557 ± 6
38	1100	340	120	0.3	902	2.07		0.0754	1.7	0.0925	1.1		0.0593	3.2	0.0906	1.1		559 ± 6
39	80	53	9.2	0.66	2710	0.69		0.0634	2.2	0.0914	1.4		0.0581	3.9	0.0908	1.4		560 ± 8
40	71	20	7.4	0.28	9070	[0.21]		0.0594	2.3	0.0909	1.3		--	--	--	--		561 ± 7
41	900	980	110	1.1	20100	0.09		0.05850	0.75	0.0910	1.2		0.05778	0.83	0.0910	1.2		562 ± 7
42	770	1000	100	1.3	50100	0.04		0.05863	0.41	0.0910	1.1		0.05834	0.42	0.0910	1.1		562 ± 6
43	370	210	42	0.56	68400	[0.03]		0.05856	0.96	0.0914	2.0		--	--	--	--		564 ± 11
44	590	450	70	0.78	28300	0.07	0.2	0.05862	0.47	0.0916	1.3		0.05811	0.49	0.0916	1.3		565 ± 7
45	320	170	35	0.54	1850	1.01		0.06566	1.1	0.0926	1.2		0.0578	2.5	0.0917	1.2		566 ± 7
46	900	1200	120	1.3	2130	0.88		0.06549	0.80	0.0926	2.1		0.0587	1.8	0.0918	2.1		566 ± 11
47	82	72	10	0.87	9430	[0.20]		0.0603	3.0	0.0922	1.3		--	--	--	--		568 ± 7
48	260	140	29	0.55	25100	[0.07]		0.05884	1.1	0.0923	2.0		--	--	--	--		569 ± 11
49	130	150	17	1.1	9980	[0.19]		0.05805	1.5	0.0929	2.0		--	--	--	--		573 ± 11
50	100	49	12	0.47	46300	[0.04]		0.05789	1.7	0.0937	2.4		--	--	--	--		578 ± 14
51	1100	540	130	0.48	13200	0.14	1.6	0.05859	0.97	0.0939	2.0		0.05749	1.0	0.0938	2.0		579 ± 11
52	70	16	7.5	0.23	8810	0.21	0.9	0.05897	1.2	0.0946	1.1		0.05732	1.3	0.0944	1.1		583 ± 6
53	580	160	63	0.27	8330	0.22		0.05961	0.84	0.0948	1.2		0.05786	1.7	0.0946	1.2		584 ± 7
54	240	170	29	0.7	158000	[0.01]	-1.5	0.06128	0.68	0.0975	1.2		--	--	--	--		598 ± 7
55	160	110	21	0.7	41000	[0.05]		0.05837	1.3	0.0983	2.0		--	--	--	--		606 ± 12
56	77	37	9.6	0.48	10000	0.19		0.06174	1.2	0.1033	1.3		0.06029	1.3	0.1031	1.3		633 ± 8
57	72	53	9.9	0.74	17300	[0.11]		0.06191	1.2	0.1061	1.2		--	--	--	--		650 ± 7
58	63	46	8.7	0.72	8960	0.21	0.9	0.06059	1.3	0.1072	1.2		0.05897	1.5	0.1070	1.2		657 ± 8
59	170	170	25	0.98	42100	[0.04]		0.06203	0.75	0.1071	1.2		--	--	--	--		655 ± 8
60	120	99	17	0.85	27200	[0.07]		0.06139	1.1	0.1072	1.2		--	--	--	--		657 ± 8
61	860	330	110	0.39	224	8.36		0.1312	0.91	0.1171	1.2		0.0670	3.1	0.1073	1.2
62	62	48	8.7	0.77	10500	0.18		0.06364	1.4	0.1080	1.2		0.06226	1.5	0.1078	1.2		659 ± 8
63	130	130	19	0.97	18100	0.1	0.6	0.06088	0.90	0.1089	1.2		0.06008	0.97	0.1087	1.2		667 ± 8
64	120	56	16	0.46	17600	[0.11]		0.0627	2.7	0.1097	1.2		--	--	--	--		670 ± 8
65	56	29	7.5	0.51	11800	[0.16]		0.0622	2.2	0.1098	2.1		--	--	--	--		671 ± 14
66	220	160	31	0.73	34100	0.05	0.3	0.06113	0.68	0.1099	1.1		0.06071	0.70	0.1099	1.1		673 ± 7
67	220	27	31	0.13	17000	[0.11]		0.06217	1.1	0.1099	2.0		--	--	--	--		672 ± 13
68	440	240	61	0.56	42800	0.04		0.06359	0.46	0.1142	1.3		0.06325	0.48	0.1141	1.3		696 ± 9
69	210	110	78	0.55	8900	0.21	0.2	0.10150	0.70	0.3019	1.2		0.09995	0.87	0.3013	1.2		1623 ± 16
Notes: Analyses performed on a Cameca IMS 1270 ion-microprobe at the NORDSIM facility, Sweden. Ages calculated with the decay constants of Steiger and Jäger (1977). 1- Th/U ratios from measured ThO/U calibrated to the 91500 zircon standard (Wiedenbeck et al., 1995). 2- f206, percentage of common Pb calculated from 206Pb/204Pb. 3- Disc., degree of discordance at the 2 sigma error limit between 207…
